# Supplementary material
Source: publisher figshare collection journal article supplement (https://acs.figshare.com/ndownloader/files/4132183)
Supplement: Supplementary file 1 [file 4132183]

  
data_120512a 
  
_audit_creation_method            SHELXL-97 
_chemical_name_systematic 
; 
 ? 
; 
_chemical_name_common             ? 
_chemical_melting_point           ? 
_chemical_formula_moiety          ? 
_chemical_formula_sum 
 'C25 H25 Cl N2 O3' 
_chemical_formula_weight          436.92 
  
loop_ 
 _atom_type_symbol 
 _atom_type_description 
 _atom_type_scat_dispersion_real 
 _atom_type_scat_dispersion_imag 
 _atom_type_scat_source 
 'C'  'C'   0.0033   0.0016 
 'International Tables Vol C Tables 4.2.6.8 and 6.1.1.4' 
 'H'  'H'   0.0000   0.0000 
 'International Tables Vol C Tables 4.2.6.8 and 6.1.1.4' 
 'N'  'N'   0.0061   0.0033 
 'International Tables Vol C Tables 4.2.6.8 and 6.1.1.4' 
 'O'  'O'   0.0106   0.0060 
 'International Tables Vol C Tables 4.2.6.8 and 6.1.1.4' 
 'Cl'  'Cl'   0.1484   0.1585 
 'International Tables Vol C Tables 4.2.6.8 and 6.1.1.4' 
  
_symmetry_cell_setting            Monoclinic 
_symmetry_space_group_name_H-M    P2(1)/n 
  
loop_ 
 _symmetry_equiv_pos_as_xyz 
 'x, y, z' 
 '-x+1/2, y+1/2, -z+1/2' 
 '-x, -y, -z' 
 'x-1/2, -y-1/2, z-1/2' 
  
_cell_length_a                    6.5620(8) 
_cell_length_b                    15.7896(16) 
_cell_length_c                    22.268(2) 
_cell_angle_alpha                 90.00 
_cell_angle_beta                  93.4840(10) 
_cell_angle_gamma                 90.00 
_cell_volume                      2302.9(4) 
_cell_formula_units_Z             4 
_cell_measurement_temperature     298(2) 
_cell_measurement_reflns_used     947 
_cell_measurement_theta_min       2.241 
_cell_measurement_theta_max       28.179 
  
_exptl_crystal_description        block 
_exptl_crystal_colour             'pale white'
_exptl_crystal_size_max           0.15 
_exptl_crystal_size_mid           0.08 
_exptl_crystal_size_min           0.05 
_exptl_crystal_density_meas       ? 
_exptl_crystal_density_diffrn     1.260 
_exptl_crystal_density_method     'not measured' 
_exptl_crystal_F_000              920 
_exptl_absorpt_coefficient_mu     0.194 
_exptl_absorpt_correction_type    multi-scan 
_exptl_absorpt_correction_T_min   0.9715 
_exptl_absorpt_correction_T_max   0.9904 
_exptl_absorpt_process_details    sadabs 
  
_exptl_special_details 
; 
 ? 
; 
  
_diffrn_ambient_temperature       298(2) 
_diffrn_radiation_wavelength      0.71073 
_diffrn_radiation_type            MoK\a 
_diffrn_radiation_source          'fine-focus sealed tube' 
_diffrn_radiation_monochromator   graphite 
_diffrn_measurement_device_type   'CCD area detector' 
_diffrn_measurement_method        'phi and omega scans' 
_diffrn_detector_area_resol_mean  ? 
_diffrn_standards_number          ? 
_diffrn_standards_interval_count  ? 
_diffrn_standards_interval_time   ? 
_diffrn_standards_decay_%         ? 
_diffrn_reflns_number             11375 
_diffrn_reflns_av_R_equivalents   0.1019 
_diffrn_reflns_av_sigmaI/netI     0.1408 
_diffrn_reflns_limit_h_min        -7 
_diffrn_reflns_limit_h_max        7 
_diffrn_reflns_limit_k_min        -18 
_diffrn_reflns_limit_k_max        17 
_diffrn_reflns_limit_l_min        -26 
_diffrn_reflns_limit_l_max        21 
_diffrn_reflns_theta_min          2.24 
_diffrn_reflns_theta_max          25.02 
_reflns_number_total              4058 
_reflns_number_gt                 1557 
_reflns_threshold_expression      >2sigma(I) 
  
_computing_data_collection        'Bruker SMART' 
_computing_cell_refinement        'Bruker SMART' 
_computing_data_reduction         'Bruker SHELXTL' 
_computing_structure_solution     'SHELXS-97 (Sheldrick, 1990)' 
_computing_structure_refinement   'SHELXL-97 (Sheldrick, 1997)' 
_computing_molecular_graphics     'Bruker SHELXTL' 
_computing_publication_material   'Bruker SHELXTL' 
  
_refine_special_details 
; 
 Refinement of F^2^ against ALL reflections.  The weighted R-factor wR and 
 goodness of fit S are based on F^2^, conventional R-factors R are based 
 on F, with F set to zero for negative F^2^. The threshold expression of 
 F^2^ > 2sigma(F^2^) is used only for calculating R-factors(gt) etc. and is 
 not relevant to the choice of reflections for refinement.  R-factors based 
 on F^2^ are statistically about twice as large as those based on F, and R- 
 factors based on ALL data will be even larger. 
; 
  
_refine_ls_structure_factor_coef  Fsqd 
_refine_ls_matrix_type            full 
_refine_ls_weighting_scheme       calc 
_refine_ls_weighting_details 
 'calc w=1/[\s^2^(Fo^2^)+(0.0006P)^2^+0.0000P] where P=(Fo^2^+2Fc^2^)/3' 
_atom_sites_solution_primary      direct 
_atom_sites_solution_secondary    difmap 
_atom_sites_solution_hydrogens    geom 
_refine_ls_hydrogen_treatment     constr 
_refine_ls_extinction_method      none 
_refine_ls_extinction_coef        ? 
_refine_ls_number_reflns          4058 
_refine_ls_number_parameters      280 
_refine_ls_number_restraints      0 
_refine_ls_R_factor_all           0.1705 
_refine_ls_R_factor_gt            0.0599 
_refine_ls_wR_factor_ref          0.0966 
_refine_ls_wR_factor_gt           0.0809 
_refine_ls_goodness_of_fit_ref    0.990 
_refine_ls_restrained_S_all       0.990 
_refine_ls_shift/su_max           0.000 
_refine_ls_shift/su_mean          0.000 
  
loop_ 
 _atom_site_label 
 _atom_site_type_symbol 
 _atom_site_fract_x 
 _atom_site_fract_y 
 _atom_site_fract_z 
 _atom_site_U_iso_or_equiv 
 _atom_site_adp_type 
 _atom_site_occupancy 
 _atom_site_symmetry_multiplicity 
 _atom_site_calc_flag 
 _atom_site_refinement_flags 
 _atom_site_disorder_assembly 
 _atom_site_disorder_group 
Cl1 Cl 0.83691(18) 0.09476(9) 0.01416(6) 0.1064(5) Uani 1 1 d . . . 
N1 N 0.3742(4) 0.4729(2) 0.24729(14) 0.0445(8) Uani 1 1 d . . . 
N2 N 0.2551(4) 0.28976(19) 0.15444(13) 0.0474(9) Uani 1 1 d . . . 
H2 H 0.1267 0.2794 0.1489 0.057 Uiso 1 1 calc R . . 
O1 O 0.5142(4) 0.18845(16) 0.25521(11) 0.0536(8) Uani 1 1 d . . . 
O2 O 0.6863(4) 0.58096(16) 0.23530(11) 0.0626(8) Uani 1 1 d . . . 
H2A H 0.7825 0.6141 0.2347 0.094 Uiso 1 1 calc R . . 
O3 O 0.5400(4) 0.68771(19) 0.28113(14) 0.0849(11) Uani 1 1 d . . . 
C1 C 0.2831(5) 0.4354(3) 0.19466(17) 0.0419(10) Uani 1 1 d . . . 
C2 C 0.3248(5) 0.3513(2) 0.19703(16) 0.0404(10) Uani 1 1 d . . . 
C3 C 0.4482(5) 0.3356(2) 0.25178(16) 0.0406(10) Uani 1 1 d . . . 
C4 C 0.5360(5) 0.2601(3) 0.27724(17) 0.0459(11) Uani 1 1 d . . . 
C5 C 0.6582(6) 0.2721(3) 0.33778(16) 0.0572(12) Uani 1 1 d . . . 
H5A H 0.5681 0.2598 0.3696 0.069 Uiso 1 1 calc R . . 
H5B H 0.7663 0.2301 0.3403 0.069 Uiso 1 1 calc R . . 
C6 C 0.7547(6) 0.3587(3) 0.35058(17) 0.0535(11) Uani 1 1 d . . . 
C7 C 0.5891(5) 0.4266(3) 0.34056(16) 0.0562(12) Uani 1 1 d . . . 
H7A H 0.4958 0.4241 0.3727 0.067 Uiso 1 1 calc R . . 
H7B H 0.6516 0.4823 0.3412 0.067 Uiso 1 1 calc R . . 
C8 C 0.4730(5) 0.4125(3) 0.28081(17) 0.0426(10) Uani 1 1 d . . . 
C9 C 0.5352(6) 0.6169(3) 0.26207(18) 0.0513(11) Uani 1 1 d . . . 
C10 C 0.3497(5) 0.5610(2) 0.26605(16) 0.0489(11) Uani 1 1 d . . . 
H10A H 0.3105 0.5613 0.3073 0.059 Uiso 1 1 calc R . . 
H10B H 0.2381 0.5858 0.2414 0.059 Uiso 1 1 calc R . . 
C11 C 0.1640(6) 0.4864(3) 0.14908(17) 0.0442(10) Uani 1 1 d . . . 
C12 C 0.2456(6) 0.5543(3) 0.11963(18) 0.0619(13) Uani 1 1 d . . . 
H12 H 0.3796 0.5706 0.1296 0.074 Uiso 1 1 calc R . . 
C13 C 0.1312(7) 0.5992(3) 0.07515(19) 0.0725(14) Uani 1 1 d . . . 
H13 H 0.1905 0.6444 0.0559 0.087 Uiso 1 1 calc R . . 
C14 C -0.0696(8) 0.5772(3) 0.05936(19) 0.0644(13) Uani 1 1 d . . . 
C15 C -0.1486(6) 0.5084(3) 0.0880(2) 0.0707(14) Uani 1 1 d . . . 
H15 H -0.2815 0.4914 0.0772 0.085 Uiso 1 1 calc R . . 
C16 C -0.0374(6) 0.4637(3) 0.13245(18) 0.0590(12) Uani 1 1 d . . . 
H16 H -0.0972 0.4182 0.1513 0.071 Uiso 1 1 calc R . . 
C17 C -0.1960(7) 0.6262(3) 0.01103(17) 0.1000(18) Uani 1 1 d . . . 
H17A H -0.1337 0.6803 0.0049 0.150 Uiso 1 1 calc R . . 
H17B H -0.3317 0.6344 0.0238 0.150 Uiso 1 1 calc R . . 
H17C H -0.2018 0.5948 -0.0259 0.150 Uiso 1 1 calc R . . 
C18 C 0.3956(6) 0.2457(2) 0.12126(16) 0.0417(10) Uani 1 1 d . . . 
C19 C 0.5848(6) 0.2775(3) 0.11051(17) 0.0587(12) Uani 1 1 d . . . 
H19 H 0.6226 0.3304 0.1259 0.070 Uiso 1 1 calc R . . 
C20 C 0.7206(6) 0.2328(3) 0.07735(19) 0.0746(15) Uani 1 1 d . . . 
H20 H 0.8480 0.2555 0.0705 0.090 Uiso 1 1 calc R . . 
C21 C 0.6649(7) 0.1539(3) 0.05443(17) 0.0626(13) Uani 1 1 d . . . 
C22 C 0.4748(7) 0.1208(3) 0.06358(17) 0.0600(12) Uani 1 1 d . . . 
H22 H 0.4370 0.0682 0.0478 0.072 Uiso 1 1 calc R . . 
C23 C 0.3409(6) 0.1667(3) 0.09648(16) 0.0486(11) Uani 1 1 d . . . 
H23 H 0.2121 0.1447 0.1023 0.058 Uiso 1 1 calc R . . 
C24 C 0.9269(6) 0.3744(3) 0.30778(18) 0.0803(15) Uani 1 1 d . . . 
H24A H 0.8723 0.3713 0.2669 0.120 Uiso 1 1 calc R . . 
H24B H 1.0311 0.3323 0.3145 0.120 Uiso 1 1 calc R . . 
H24C H 0.9844 0.4296 0.3153 0.120 Uiso 1 1 calc R . . 
C25 C 0.8416(6) 0.3619(3) 0.41573(16) 0.0805(15) Uani 1 1 d . . . 
H25A H 0.9473 0.3201 0.4217 0.121 Uiso 1 1 calc R . . 
H25B H 0.7349 0.3504 0.4422 0.121 Uiso 1 1 calc R . . 
H25C H 0.8973 0.4171 0.4242 0.121 Uiso 1 1 calc R . . 
  
loop_ 
 _atom_site_aniso_label 
 _atom_site_aniso_U_11 
 _atom_site_aniso_U_22 
 _atom_site_aniso_U_33 
 _atom_site_aniso_U_23 
 _atom_site_aniso_U_13 
 _atom_site_aniso_U_12 
Cl1 0.0772(8) 0.1488(14) 0.0936(10) -0.0476(9) 0.0072(8) 0.0238(9) 
N1 0.0428(19) 0.035(2) 0.055(2) -0.0033(18) -0.0009(17) 0.0021(18) 
N2 0.0373(19) 0.051(2) 0.053(2) -0.0125(18) -0.0109(17) -0.0025(17) 
O1 0.0496(17) 0.0361(18) 0.074(2) -0.0001(15) -0.0064(15) -0.0005(15) 
O2 0.0525(17) 0.052(2) 0.085(2) -0.0159(16) 0.0186(16) -0.0039(15) 
O3 0.072(2) 0.046(2) 0.139(3) -0.037(2) 0.029(2) -0.0077(18) 
C1 0.035(2) 0.046(3) 0.044(3) 0.000(2) 0.0002(19) -0.004(2) 
C2 0.039(2) 0.033(3) 0.049(3) 0.000(2) 0.006(2) -0.008(2) 
C3 0.042(2) 0.033(3) 0.046(3) -0.002(2) -0.001(2) 0.000(2) 
C4 0.038(2) 0.050(3) 0.050(3) 0.000(2) 0.004(2) -0.004(2) 
C5 0.066(3) 0.058(3) 0.048(3) 0.009(2) -0.004(2) 0.010(3) 
C6 0.060(3) 0.055(3) 0.044(3) -0.001(2) -0.009(2) 0.001(3) 
C7 0.061(3) 0.060(3) 0.047(3) -0.004(2) -0.002(2) -0.004(2) 
C8 0.040(2) 0.039(3) 0.048(3) -0.001(2) 0.002(2) -0.002(2) 
C9 0.047(3) 0.047(3) 0.060(3) -0.001(2) 0.001(2) 0.002(3) 
C10 0.050(3) 0.048(3) 0.048(3) -0.007(2) 0.001(2) 0.004(2) 
C11 0.045(3) 0.042(3) 0.046(3) 0.000(2) 0.001(2) 0.004(2) 
C12 0.055(3) 0.056(3) 0.075(3) 0.012(3) 0.003(3) -0.001(3) 
C13 0.086(4) 0.060(3) 0.071(3) 0.017(3) 0.006(3) 0.004(3) 
C14 0.083(4) 0.060(4) 0.050(3) -0.005(3) 0.002(3) 0.025(3) 
C15 0.062(3) 0.082(4) 0.066(4) -0.004(3) -0.017(3) 0.005(3) 
C16 0.052(3) 0.064(3) 0.061(3) 0.009(2) -0.001(2) -0.005(3) 
C17 0.128(4) 0.108(5) 0.061(3) 0.007(3) -0.022(3) 0.048(4) 
C18 0.047(3) 0.038(3) 0.038(3) 0.002(2) -0.011(2) -0.003(2) 
C19 0.050(3) 0.064(3) 0.062(3) -0.013(2) 0.008(2) -0.013(3) 
C20 0.052(3) 0.104(4) 0.069(3) -0.016(3) 0.013(3) -0.018(3) 
C21 0.052(3) 0.088(4) 0.047(3) -0.014(3) -0.001(2) 0.011(3) 
C22 0.069(3) 0.059(3) 0.050(3) -0.010(2) -0.012(3) 0.001(3) 
C23 0.047(3) 0.050(3) 0.048(3) -0.003(2) -0.007(2) -0.005(2) 
C24 0.055(3) 0.101(4) 0.084(3) 0.003(3) 0.004(3) -0.010(3) 
C25 0.083(3) 0.097(4) 0.057(3) -0.007(3) -0.028(3) -0.003(3) 
  
_geom_special_details 
; 
 All esds (except the esd in the dihedral angle between two l.s. planes) 
 are estimated using the full covariance matrix.  The cell esds are taken 
 into account individually in the estimation of esds in distances, angles 
 and torsion angles; correlations between esds in cell parameters are only 
 used when they are defined by crystal symmetry.  An approximate (isotropic) 
 treatment of cell esds is used for estimating esds involving l.s. planes. 
; 
  
loop_ 
 _geom_bond_atom_site_label_1 
 _geom_bond_atom_site_label_2 
 _geom_bond_distance 
 _geom_bond_site_symmetry_2 
 _geom_bond_publ_flag 
Cl1 C21 1.753(4) . ? 
N1 C8 1.352(4) . ? 
N1 C1 1.413(4) . ? 
N1 C10 1.464(4) . ? 
N2 C18 1.401(4) . ? 
N2 C2 1.414(4) . ? 
N2 H2 0.8600 . ? 
O1 C4 1.238(4) . ? 
O2 C9 1.317(4) . ? 
O2 H2A 0.8200 . ? 
O3 C9 1.195(4) . ? 
C1 C2 1.356(4) . ? 
C1 C11 1.481(5) . ? 
C2 C3 1.443(5) . ? 
C3 C8 1.381(4) . ? 
C3 C4 1.426(5) . ? 
C4 C5 1.538(4) . ? 
C5 C6 1.526(5) . ? 
C5 H5A 0.9700 . ? 
C5 H5B 0.9700 . ? 
C6 C25 1.527(5) . ? 
C6 C7 1.534(5) . ? 
C6 C24 1.542(5) . ? 
C7 C8 1.509(4) . ? 
C7 H7A 0.9700 . ? 
C7 H7B 0.9700 . ? 
C9 C10 1.511(5) . ? 
C10 H10A 0.9700 . ? 
C10 H10B 0.9700 . ? 
C11 C12 1.382(5) . ? 
C11 C16 1.397(4) . ? 
C12 C13 1.399(5) . ? 
C12 H12 0.9300 . ? 
C13 C14 1.387(5) . ? 
C13 H13 0.9300 . ? 
C14 C15 1.376(5) . ? 
C14 C17 1.529(5) . ? 
C15 C16 1.387(5) . ? 
C15 H15 0.9300 . ? 
C16 H16 0.9300 . ? 
C17 H17A 0.9600 . ? 
C17 H17B 0.9600 . ? 
C17 H17C 0.9600 . ? 
C18 C19 1.374(4) . ? 
C18 C23 1.402(5) . ? 
C19 C20 1.385(5) . ? 
C19 H19 0.9300 . ? 
C20 C21 1.388(5) . ? 
C20 H20 0.9300 . ? 
C21 C22 1.378(5) . ? 
C22 C23 1.383(5) . ? 
C22 H22 0.9300 . ? 
C23 H23 0.9300 . ? 
C24 H24A 0.9600 . ? 
C24 H24B 0.9600 . ? 
C24 H24C 0.9600 . ? 
C25 H25A 0.9600 . ? 
C25 H25B 0.9600 . ? 
C25 H25C 0.9600 . ? 
  
loop_ 
 _geom_angle_atom_site_label_1 
 _geom_angle_atom_site_label_2 
 _geom_angle_atom_site_label_3 
 _geom_angle 
 _geom_angle_site_symmetry_1 
 _geom_angle_site_symmetry_3 
 _geom_angle_publ_flag 
C8 N1 C1 109.0(3) . . ? 
C8 N1 C10 124.8(3) . . ? 
C1 N1 C10 125.9(3) . . ? 
C18 N2 C2 119.9(3) . . ? 
C18 N2 H2 120.1 . . ? 
C2 N2 H2 120.1 . . ? 
C9 O2 H2A 109.5 . . ? 
C2 C1 N1 107.7(3) . . ? 
C2 C1 C11 131.0(4) . . ? 
N1 C1 C11 121.2(3) . . ? 
C1 C2 N2 126.2(4) . . ? 
C1 C2 C3 107.6(3) . . ? 
N2 C2 C3 126.2(3) . . ? 
C8 C3 C4 121.0(4) . . ? 
C8 C3 C2 106.8(3) . . ? 
C4 C3 C2 132.2(4) . . ? 
O1 C4 C3 124.9(4) . . ? 
O1 C4 C5 120.1(4) . . ? 
C3 C4 C5 115.0(4) . . ? 
C6 C5 C4 117.5(3) . . ? 
C6 C5 H5A 107.9 . . ? 
C4 C5 H5A 107.9 . . ? 
C6 C5 H5B 107.9 . . ? 
C4 C5 H5B 107.9 . . ? 
H5A C5 H5B 107.2 . . ? 
C5 C6 C25 109.5(3) . . ? 
C5 C6 C7 108.5(3) . . ? 
C25 C6 C7 109.6(3) . . ? 
C5 C6 C24 109.9(3) . . ? 
C25 C6 C24 109.7(3) . . ? 
C7 C6 C24 109.6(3) . . ? 
C8 C7 C6 109.9(3) . . ? 
C8 C7 H7A 109.7 . . ? 
C6 C7 H7A 109.7 . . ? 
C8 C7 H7B 109.7 . . ? 
C6 C7 H7B 109.7 . . ? 
H7A C7 H7B 108.2 . . ? 
N1 C8 C3 108.9(3) . . ? 
N1 C8 C7 125.6(4) . . ? 
C3 C8 C7 125.6(4) . . ? 
O3 C9 O2 124.1(4) . . ? 
O3 C9 C10 122.0(4) . . ? 
O2 C9 C10 114.0(4) . . ? 
N1 C10 C9 115.8(3) . . ? 
N1 C10 H10A 108.3 . . ? 
C9 C10 H10A 108.3 . . ? 
N1 C10 H10B 108.3 . . ? 
C9 C10 H10B 108.3 . . ? 
H10A C10 H10B 107.4 . . ? 
C12 C11 C16 117.5(4) . . ? 
C12 C11 C1 123.0(4) . . ? 
C16 C11 C1 119.5(4) . . ? 
C11 C12 C13 121.5(4) . . ? 
C11 C12 H12 119.3 . . ? 
C13 C12 H12 119.3 . . ? 
C14 C13 C12 120.9(4) . . ? 
C14 C13 H13 119.6 . . ? 
C12 C13 H13 119.6 . . ? 
C15 C14 C13 117.3(4) . . ? 
C15 C14 C17 121.5(5) . . ? 
C13 C14 C17 121.2(5) . . ? 
C14 C15 C16 122.4(4) . . ? 
C14 C15 H15 118.8 . . ? 
C16 C15 H15 118.8 . . ? 
C15 C16 C11 120.4(4) . . ? 
C15 C16 H16 119.8 . . ? 
C11 C16 H16 119.8 . . ? 
C14 C17 H17A 109.5 . . ? 
C14 C17 H17B 109.5 . . ? 
H17A C17 H17B 109.5 . . ? 
C14 C17 H17C 109.5 . . ? 
H17A C17 H17C 109.5 . . ? 
H17B C17 H17C 109.5 . . ? 
C19 C18 N2 122.7(4) . . ? 
C19 C18 C23 118.0(4) . . ? 
N2 C18 C23 119.2(4) . . ? 
C18 C19 C20 121.6(4) . . ? 
C18 C19 H19 119.2 . . ? 
C20 C19 H19 119.2 . . ? 
C19 C20 C21 119.4(4) . . ? 
C19 C20 H20 120.3 . . ? 
C21 C20 H20 120.3 . . ? 
C22 C21 C20 120.4(4) . . ? 
C22 C21 Cl1 119.4(4) . . ? 
C20 C21 Cl1 120.2(4) . . ? 
C21 C22 C23 119.4(4) . . ? 
C21 C22 H22 120.3 . . ? 
C23 C22 H22 120.3 . . ? 
C22 C23 C18 121.2(4) . . ? 
C22 C23 H23 119.4 . . ? 
C18 C23 H23 119.4 . . ? 
C6 C24 H24A 109.5 . . ? 
C6 C24 H24B 109.5 . . ? 
H24A C24 H24B 109.5 . . ? 
C6 C24 H24C 109.5 . . ? 
H24A C24 H24C 109.5 . . ? 
H24B C24 H24C 109.5 . . ? 
C6 C25 H25A 109.5 . . ? 
C6 C25 H25B 109.5 . . ? 
H25A C25 H25B 109.5 . . ? 
C6 C25 H25C 109.5 . . ? 
H25A C25 H25C 109.5 . . ? 
H25B C25 H25C 109.5 . . ? 
  
loop_ 
 _geom_torsion_atom_site_label_1 
 _geom_torsion_atom_site_label_2 
 _geom_torsion_atom_site_label_3 
 _geom_torsion_atom_site_label_4 
 _geom_torsion 
 _geom_torsion_site_symmetry_1 
 _geom_torsion_site_symmetry_2 
 _geom_torsion_site_symmetry_3 
 _geom_torsion_site_symmetry_4 
 _geom_torsion_publ_flag 
C8 N1 C1 C2 0.9(4) . . . . ? 
C10 N1 C1 C2 -173.3(3) . . . . ? 
C8 N1 C1 C11 -180.0(3) . . . . ? 
C10 N1 C1 C11 5.8(5) . . . . ? 
N1 C1 C2 N2 177.2(3) . . . . ? 
C11 C1 C2 N2 -1.7(6) . . . . ? 
N1 C1 C2 C3 -1.1(4) . . . . ? 
C11 C1 C2 C3 180.0(3) . . . . ? 
C18 N2 C2 C1 116.2(4) . . . . ? 
C18 N2 C2 C3 -65.8(5) . . . . ? 
C1 C2 C3 C8 0.8(4) . . . . ? 
N2 C2 C3 C8 -177.5(3) . . . . ? 
C1 C2 C3 C4 -179.8(4) . . . . ? 
N2 C2 C3 C4 1.9(6) . . . . ? 
C8 C3 C4 O1 177.1(3) . . . . ? 
C2 C3 C4 O1 -2.3(6) . . . . ? 
C8 C3 C4 C5 -0.4(5) . . . . ? 
C2 C3 C4 C5 -179.8(3) . . . . ? 
O1 C4 C5 C6 155.4(3) . . . . ? 
C3 C4 C5 C6 -27.0(5) . . . . ? 
C4 C5 C6 C25 171.8(3) . . . . ? 
C4 C5 C6 C7 52.2(4) . . . . ? 
C4 C5 C6 C24 -67.6(4) . . . . ? 
C5 C6 C7 C8 -48.9(4) . . . . ? 
C25 C6 C7 C8 -168.4(3) . . . . ? 
C24 C6 C7 C8 71.2(4) . . . . ? 
C1 N1 C8 C3 -0.4(4) . . . . ? 
C10 N1 C8 C3 173.9(3) . . . . ? 
C1 N1 C8 C7 -179.7(3) . . . . ? 
C10 N1 C8 C7 -5.4(5) . . . . ? 
C4 C3 C8 N1 -179.7(3) . . . . ? 
C2 C3 C8 N1 -0.2(4) . . . . ? 
C4 C3 C8 C7 -0.4(5) . . . . ? 
C2 C3 C8 C7 179.0(3) . . . . ? 
C6 C7 C8 N1 -154.0(3) . . . . ? 
C6 C7 C8 C3 26.8(5) . . . . ? 
C8 N1 C10 C9 77.2(4) . . . . ? 
C1 N1 C10 C9 -109.5(4) . . . . ? 
O3 C9 C10 N1 -173.1(4) . . . . ? 
O2 C9 C10 N1 7.8(5) . . . . ? 
C2 C1 C11 C12 -122.3(5) . . . . ? 
N1 C1 C11 C12 58.8(5) . . . . ? 
C2 C1 C11 C16 54.7(6) . . . . ? 
N1 C1 C11 C16 -124.2(4) . . . . ? 
C16 C11 C12 C13 0.5(6) . . . . ? 
C1 C11 C12 C13 177.5(4) . . . . ? 
C11 C12 C13 C14 0.5(7) . . . . ? 
C12 C13 C14 C15 -1.7(7) . . . . ? 
C12 C13 C14 C17 179.7(4) . . . . ? 
C13 C14 C15 C16 2.1(7) . . . . ? 
C17 C14 C15 C16 -179.3(4) . . . . ? 
C14 C15 C16 C11 -1.2(7) . . . . ? 
C12 C11 C16 C15 -0.1(6) . . . . ? 
C1 C11 C16 C15 -177.2(4) . . . . ? 
C2 N2 C18 C19 -24.6(5) . . . . ? 
C2 N2 C18 C23 157.0(3) . . . . ? 
N2 C18 C19 C20 -179.7(4) . . . . ? 
C23 C18 C19 C20 -1.3(6) . . . . ? 
C18 C19 C20 C21 -0.1(6) . . . . ? 
C19 C20 C21 C22 1.2(6) . . . . ? 
C19 C20 C21 Cl1 -178.2(3) . . . . ? 
C20 C21 C22 C23 -0.8(6) . . . . ? 
Cl1 C21 C22 C23 178.6(3) . . . . ? 
C21 C22 C23 C18 -0.7(6) . . . . ? 
C19 C18 C23 C22 1.8(6) . . . . ? 
N2 C18 C23 C22 -179.8(3) . . . . ? 
  
_diffrn_measured_fraction_theta_max    0.999 
_diffrn_reflns_theta_full              25.02 
_diffrn_measured_fraction_theta_full   0.999 
_refine_diff_density_max    0.303 
_refine_diff_density_min   -0.325 
_refine_diff_density_rms    0.046 
